# Supplementary material for: 2-Methoxy-1,4-naphthoquinone regulated molecular alternation ofFusarium proliferatumrevealed by high-dimensional biological data
Source: Royal Society of Chemistry journal article supplement (doi:10.1039/d2ra02425j), 2022-01-01
Supplement: d2ra02425j1.zip [file d2ra02425j1.zip]

**Table S2.** Prime pairs used for RT-qPCR

| Gene ID and description                                       | Sequence of primer (5' to 3')                        |
|---------------------------------------------------------------|------------------------------------------------------|
| <b>Histone H3</b>                                             | F: ACTAAGCAGACCGCCCGCAGG<br>R: GCGGGCGAGCTGGATGTCCTT |
| <b>FPRO_01310</b><br><b>Acetyl-CoA synthetase</b>             | F: GTACACCTGCCTACCCCAAC<br>R: TTCAGCAGTCTCAAAGCGGT   |
| <b>FPRO_05233</b><br><b>Catalase</b>                          | F: ACAGCTATGGTGTGGTGACG<br>R: TTACGGTGCTGGCTGATGTT   |
| <b>FPRO_10271</b><br><b>Formamidase</b>                       | F: AGTCCCTCACGCTACCTCAT<br>R: TATTCGATTGCGCGGAGACA   |
| <b>FPRO_09323</b><br><b>Glycine hydroxymethyltransferase</b>  | F: CGGTGGTCTTCGTCTTGGA<br>R: GGCGTCCTTATCAACCGCTA    |
| <b>FPRO_06124</b><br><b>Glutathione reductase</b>             | F: GCCTATGGCTTCTCCGTTGA<br>R: GCTCGTAGATGCCGTTTCA    |
| <b>FPRO_01912</b><br><b>Glutathione S-transferase</b>         | F: GGCTCTCAACCTCAAGCAGA<br>R: CGGGGTGTGCTGAGATCAAT   |
| <b>FPRO_03658</b><br><b>5-Oxoprolinase (ATP-hydrolysing)</b>  | F: ACGGGAGCTATGAGACAGGT<br>R: TCCAAAGCCGACCCATAACC   |
| <b>FPRO_09374</b><br><b>Phosphoenolpyruvate carboxykinase</b> | F: ATCCGACCTTCACGAGAGGA<br>R: TCGAAGTTGATGGCAACGGA   |
| <b>FPRO_12920</b><br><b>Peroxidase</b>                        | F: GCCACTGTCACCCACGATAA<br>R: GACGAGAGGCGCATTAGGAA   |
| <b>FPRO_06025</b><br><b>Formate dehydrogenase</b>             | F: CATCACCACTCCCTTCCACC<br>R: CTGGTGGTCCCAGACATCAC   |
