# Supplementary material for: 2-Methoxy-1,4-naphthoquinone regulated molecular alternation ofFusarium proliferatumrevealed by high-dimensional biological data
Source: Royal Society of Chemistry journal article supplement (doi:10.1039/d2ra02425j), 2022-01-01
Supplement: d2ra02425j1.zip [file d2ra02425j1.zip]

**Table S1.** Classification of differential metabolites

|                        |                |                                                                                                                                                                                                                                                                        |
|------------------------|----------------|------------------------------------------------------------------------------------------------------------------------------------------------------------------------------------------------------------------------------------------------------------------------|
| Carbohydrates (27)     | Up-regulated   | D-Mannitol; Galactonic acid; Hydroxyacetone; UDP-N-acetylglucosamine; L-Threonate; D-Xylulose; Xylitol; Ribitol; D-Sorbitol; N,N'-Diacetylchitobiose; L-Rhamnose                                                                                                       |
|                        | Down-regulated | Gluconolactone; Muramic acid; Trehalose; 3- $\alpha$ -Mannobiose; D-Melibiose; L-Sorbose; D-Lyxose; Erythritol; D-Mannose; Maltotetraose; $\alpha,\alpha$ -Trehalose; Stachyose; N-Acetylglucosamine-1-phosphate; Maltopentaose; Maleamic acid; D-Mannitol 1-phosphate |
| Lipids (15)            | Up-regulated   | PC; Hioetheramide-PC; 1-Stearoyl-2-oleoyl-sn-GPC; 1-Palmitoyl-sn-GPC; 1-Stearoyl-sn-GPC; 1-Oleoyl-sn-GPC; 1,2-dioleoyl-sn-GPC; Linoleic acid; Glyceric acid; $\alpha$ -Linolenic acid; Mvristic acid; $\alpha$ -Pinene; Docosaheaxaenoic acid                          |
|                        | Down-regulated | Arabinono-1,4-lactone; 1-Palmitoyl-2-hydroxy-sn-GPE                                                                                                                                                                                                                    |
| Amino acids (11)       | Up-regulated   | L-Threonine; Allocystathionine; L-Proline; L-Aspartate; D-Proline; L-Pipecolic acid                                                                                                                                                                                    |
|                        | Down-regulated | 4-Guanidinobutyric acid; L-Pyroglutamic acid; L-Citrulline; 4-Aminobutyric acid; (S)-2-Hydroxyglutarate                                                                                                                                                                |
| Nucleic acids (10)     | Up-regulated   | Adenine; Adenosine; Uracil; Cytidine; Cytosine; Guanosine; Oxypurinol; 2-Hydroxyadenine; 2'-O-methyladenosine                                                                                                                                                          |
|                        | Down-regulated | AMP                                                                                                                                                                                                                                                                    |
| Peptides (4)           | Down-regulated | Pro-Met; Arg-Cys; Pro-Ala; Ammelide                                                                                                                                                                                                                                    |
| Cofactors/vitamins (4) | Up-regulated   | (3-Carboxypropyl)-trimethylammonium cation; Riboflavin                                                                                                                                                                                                                 |
|                        | Down-regulated | Pyridoxine; Nicotinate                                                                                                                                                                                                                                                 |
| Energy (4)             | Up-regulated   | Succinate; 2-Isopropylmalic acid                                                                                                                                                                                                                                       |
|                        | Down-regulated | Argininosuccinic acid; Citrate                                                                                                                                                                                                                                         |
| Others (4)             | Up-regulated   | Lawson; Immunomycin; 1-Phenylethylamine; Jasmine lactone; Betaine; Xanthine                                                                                                                                                                                            |
|                        | Down-regulated | Urea; 1,2,3-Benzenetriol; Dihydroxyacetone; Betaine aldehyde; Imidazole                                                                                                                                                                                                |
