# Supplementary figures and images for: 2-Methoxy-1,4-naphthoquinone regulated molecular alternation ofFusarium proliferatumrevealed by high-dimensional biological data
Source: Royal Society of Chemistry journal article supplement (doi:10.1039/d2ra02425j), 2022-01-01

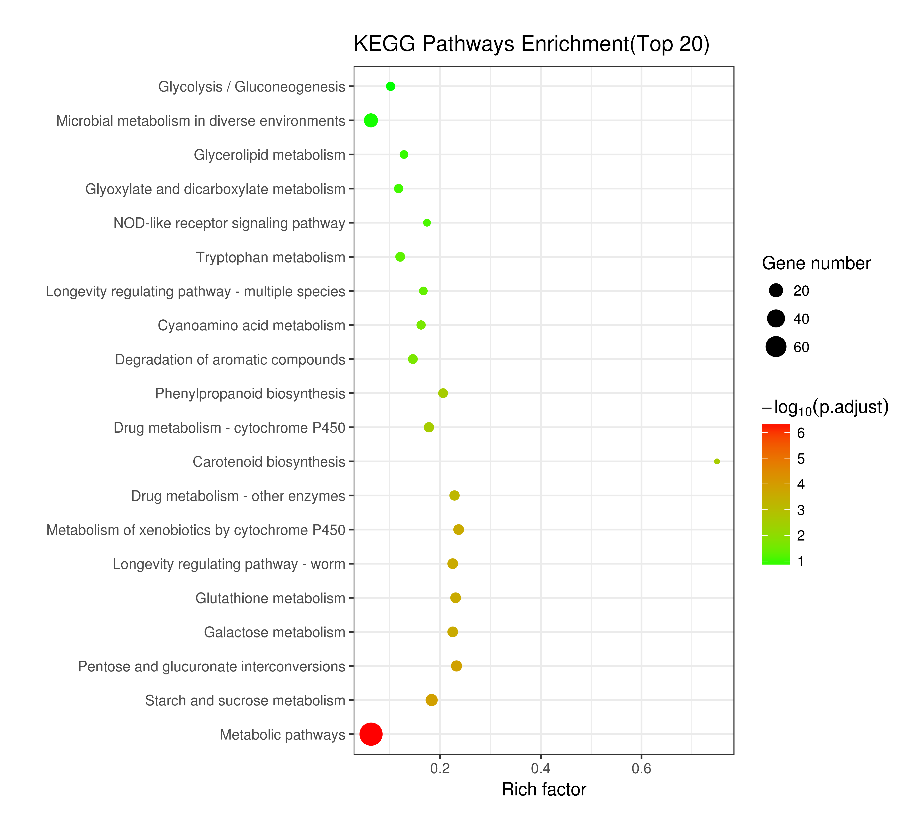


**(a)**


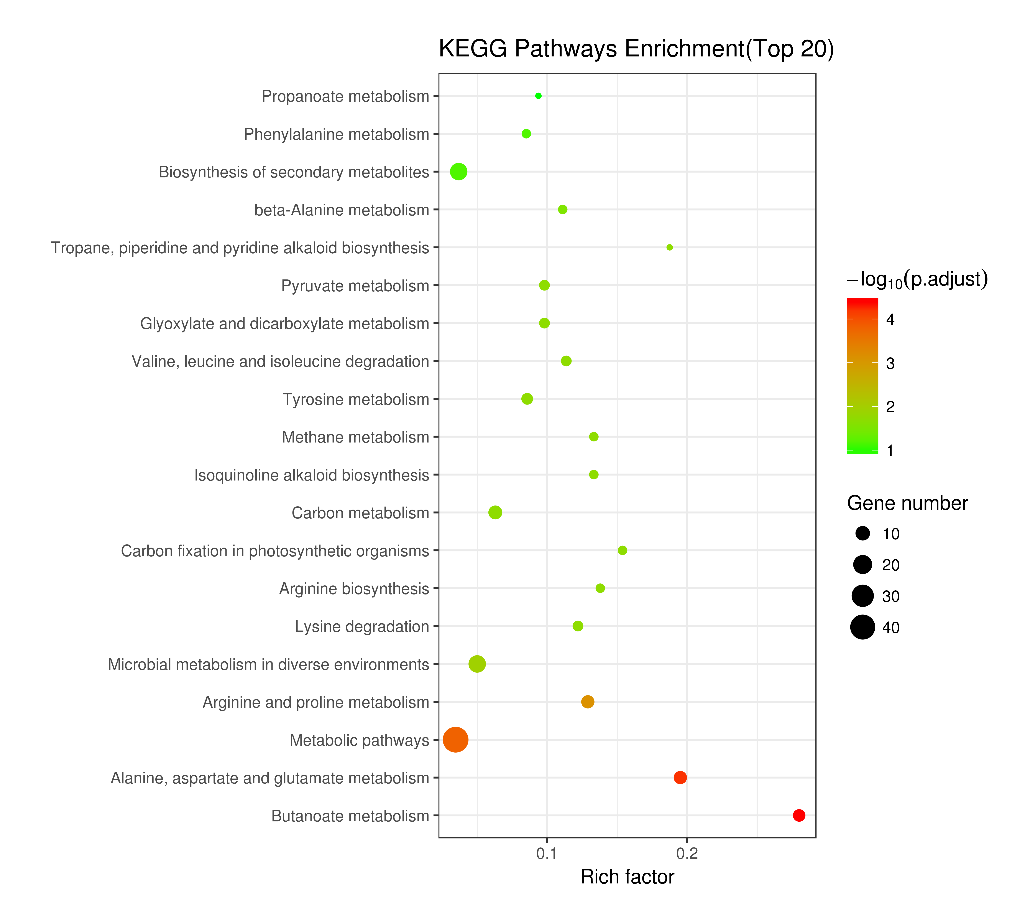


**(b)**

Figure S1. (**a**) KEGG pathways of up-regulated genes, (**b**) KEGG pathways of down-regulated genes.

Supplement: d2ra02425j1.zip [file d2ra02425j1.zip]

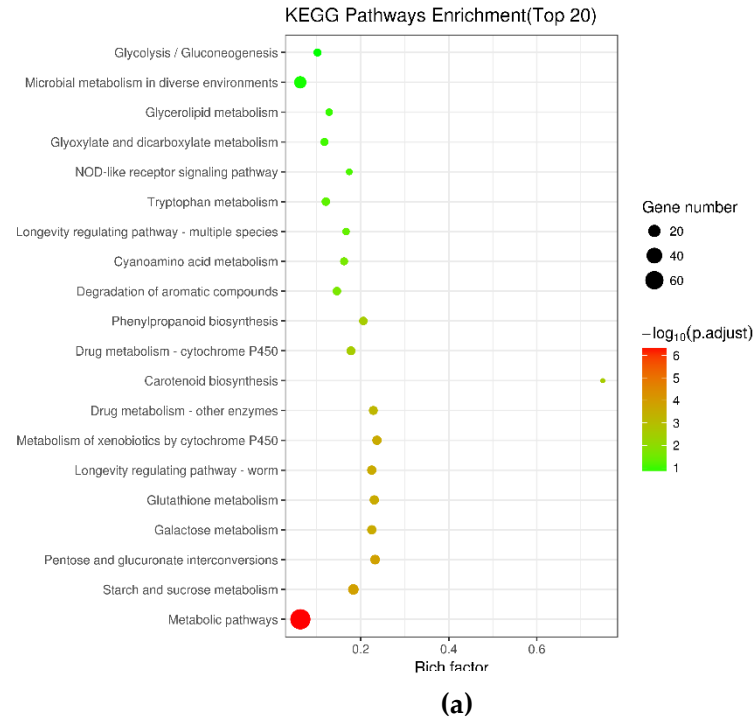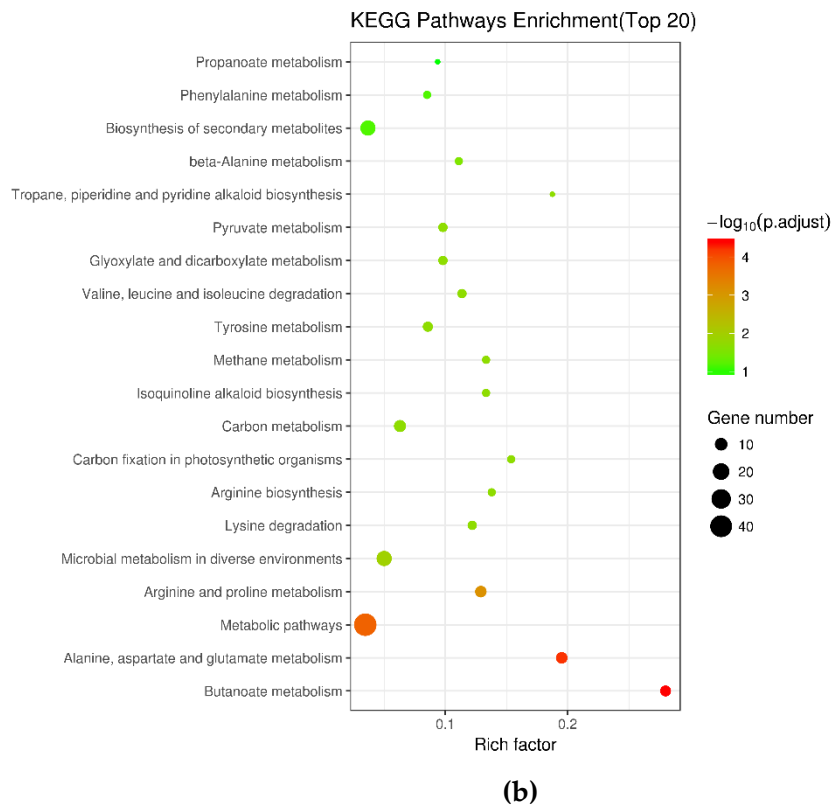

Figure S1. (a) KEGG pathways of up-regulated genes, (b) KEGG pathways of down-regulated genes.

Supplement: d2ra02425j1.zip [file d2ra02425j1.zip]
